# Supplementary material for: Nurse-run preanaesthesia assessment clinics: an initiative towards improving the quality of perioperative care at the ambulatory care centre
Source: PubMed Central journal article supplement — BMJ Open Qual. 2021 Dec 6;10(4):e001066. doi: 10.1136/bmjoq-2020-001066 (PMC8655555; doi:10.1136/bmjoq-2020-001066), 2021-12-06
Supplement: bmjoq-2020-001066supp001.pdf [file bmjoq-2020-001066supp001.pdf]

### Appendix: QCHP Accredited curriculum for training the nurses

#### Learning Outcomes: At the end of this activity audience will be able to:

| No | Specific Learning Outcomes                                                                                                                                                                                                            | TOPIC                                             | CONTENT                                                                                                                                                                                                                                                                                                                                  | Time     |
|----|---------------------------------------------------------------------------------------------------------------------------------------------------------------------------------------------------------------------------------------|---------------------------------------------------|------------------------------------------------------------------------------------------------------------------------------------------------------------------------------------------------------------------------------------------------------------------------------------------------------------------------------------------|----------|
| 1. | Contributes to the gelling of the group in order to foster confidence and collegiality during the program                                                                                                                             | Introduction to The PASS clinic environment       | <ul style="list-style-type: none"> <li>• ICE breaker, overview of the program and overview of formative and summative assessments</li> </ul>                                                                                                                                                                                             | 1 hour   |
| 2. | Identifies the roles, responsibilities and contributions of PAAC health care professional working within the PAAC team                                                                                                                |                                                   | <ul style="list-style-type: none"> <li>• Introduction to pre anaesthesia assessment Clinic</li> <li>• Roles, responsibilities of PAAC health care professional</li> </ul>                                                                                                                                                                |          |
| 3. | Develops an action plan for managing 'risk' associated with the JCI patient safety goals in their specific practice area.                                                                                                             | Patient safety goals                              | JCI international patient safety goals IPSPG <ul style="list-style-type: none"> <li>• Identify the correct patient</li> <li>• Improve effective communication</li> <li>• High Alert medication</li> <li>• Correct site, correct procedure, and correct patient.</li> <li>• Reducing risk of Health care associated Infections</li> </ul> | 1 hour   |
| 4. | Maps the patient journey in PASS clinic. Identifies potential 'red flags' along that journey.                                                                                                                                         | The ambulatory patient journey                    | <ul style="list-style-type: none"> <li>• from primary consultation to discharge; red flags</li> </ul>                                                                                                                                                                                                                                    | 30 mins  |
| 5. | Apply the principles of patient assessment to their role as a PAAC nurse                                                                                                                                                              | Pre Anaesthesia Assessment for ambulatory Patient | <ul style="list-style-type: none"> <li>• Assessment process</li> <li>• Physical assessment               <ul style="list-style-type: none"> <li>○ Techniques</li> <li>○ Equipment's</li> </ul> </li> <li>• ADL</li> </ul>                                                                                                                | 2 hours  |
| 6. | Applies the best practice principles of health history interviewing skills.                                                                                                                                                           | Interview skills                                  | <ul style="list-style-type: none"> <li>• Health history interviewing skills</li> <li>• Observation of patient engagement               <ul style="list-style-type: none"> <li>○ Staff centric</li> <li>○ Patient centric</li> </ul> </li> </ul>                                                                                          | 1 hour   |
| 7. | Identify the major cross infection risks to patients and staff in the pre-assessment clinic environment and discuss the infection control practices that are indicated where a patient is known to have: MRSA / VRO / Hepatitis / HIV | Infection control                                 | <ul style="list-style-type: none"> <li>• infection control practices</li> <li>• universal precautions</li> <li>• screening; MRSA; VRO; Heb ABC; HIV;</li> <li>• NICE guidelines</li> </ul>                                                                                                                                               | 1.5 hour |

| No. | Specific Learning Outcomes                                                                       | TOPIC                                  | CONTENT                                                                                                                                                                                                                                                                                                                                                                                                                       | Time     |
|-----|--------------------------------------------------------------------------------------------------|----------------------------------------|-------------------------------------------------------------------------------------------------------------------------------------------------------------------------------------------------------------------------------------------------------------------------------------------------------------------------------------------------------------------------------------------------------------------------------|----------|
| 8.  | Define the following terms: general / local / regional anaesthesia.                              | Introduction to Anaesthesia Techniques | <ul style="list-style-type: none"> <li>• Anaesthesia definitions; types; approaches.</li> </ul>                                                                                                                                                                                                                                                                                                                               | 1 hour   |
| 9.  | Associates specific body systems problems with potential anaesthetic / surgical risks.           | Physical assessment                    | <ul style="list-style-type: none"> <li>• Physical Examination               <ul style="list-style-type: none"> <li>○ Airway examination</li> <li>○ Other systems</li> </ul> </li> </ul>                                                                                                                                                                                                                                       | 1 hours  |
| 10. | Demonstrates a plan of action related to risks and complications associated with anaesthesia.    | Anaesthetic risk assessment            | <ul style="list-style-type: none"> <li>• Factors placing pt. at risk during anaesthesia               <ul style="list-style-type: none"> <li>○ Medical surgical history</li> <li>○ Positioning</li> <li>○ Obesity</li> <li>○ Medication allergy</li> <li>○ Cardio vascular diseases</li> <li>○ Respiratory diseases</li> <li>○ CNS diseases</li> <li>○ Elderly patient</li> <li>○ Cognitive impairment</li> </ul> </li> </ul> | 1.5 hour |
| 11. | Explain the rationale for ordering of individual investigations required for the patient in PAAC | Investigations and clinical scores     | <ul style="list-style-type: none"> <li>• NICE traffic light system</li> <li>• Surgery Grades</li> <li>• ASA Grades</li> </ul>                                                                                                                                                                                                                                                                                                 | 1 hour   |
| 12. | Identify normal and abnormal components on the EKG.                                              | Basic ECG                              | 12 lead ECG.                                                                                                                                                                                                                                                                                                                                                                                                                  | 2.5 hour |

| No. | Specific Learning Outcomes                                                                                                                                                                                                               | TOPIC                                                     | CONTENT                                                                                                                                                                                                                                                                                                                                                                                                                                                                                            | Time     |
|-----|------------------------------------------------------------------------------------------------------------------------------------------------------------------------------------------------------------------------------------------|-----------------------------------------------------------|----------------------------------------------------------------------------------------------------------------------------------------------------------------------------------------------------------------------------------------------------------------------------------------------------------------------------------------------------------------------------------------------------------------------------------------------------------------------------------------------------|----------|
| 13. | Identify the roles of common drugs used in anaesthesia for: <ul style="list-style-type: none"> <li>• Induction</li> <li>• Paralyzing</li> <li>• Maintaining anaesthesia</li> <li>• Reversing anaesthesia</li> <li>• Analgesia</li> </ul> | Introduction to Anaesthetic Pharmacology                  | <ul style="list-style-type: none"> <li>• common drugs used in anaesthesia for: <ul style="list-style-type: none"> <li>○ Induction</li> <li>○ Paralyzing</li> <li>○ Maintaining anaesthesia</li> <li>○ Reversing anaesthesia</li> <li>○ Analgesia</li> </ul> </li> </ul>                                                                                                                                                                                                                            | 1 hour   |
| 14. | Identify the role of the PAAC nurses in recognizing specific patient pharmacological risks.                                                                                                                                              | Pharmacological assessment for Day Surgery                | <ul style="list-style-type: none"> <li>• Specific conditions patients medications</li> </ul>                                                                                                                                                                                                                                                                                                                                                                                                       | 1 hours  |
| 15. | Discuss a plan of action when the following anaesthetic 'red flags' are identified                                                                                                                                                       | Pharmacology red flags and Managing pharmacological risks | <ul style="list-style-type: none"> <li>• Discuss a plan of action when the following anaesthetic 'red flags' are identified: <ul style="list-style-type: none"> <li>○ Smoker</li> <li>○ Gastro-intestinal reflux</li> <li>○ Liver impairment</li> <li>○ Clotting disorder</li> <li>○ Diabetes mellitus</li> <li>○ Epilepsy</li> <li>○ Anaemia</li> <li>○ Hemiparesis</li> <li>○ Thyrotoxicosis</li> <li>○ Hypertension</li> <li>○ Intra-cardiac device</li> <li>○ Pregnancy</li> </ul> </li> </ul> | 1.5 hour |
| 16. | Demonstrate ISBAR communication skills                                                                                                                                                                                                   | Hand off communication                                    | <ul style="list-style-type: none"> <li>• ISBAR communication</li> </ul>                                                                                                                                                                                                                                                                                                                                                                                                                            | 1 hour   |
| 17. | Demonstrate ability                                                                                                                                                                                                                      | Patient family education and discharge plan               | <ul style="list-style-type: none"> <li>• Pre anaesthesia patient teaching</li> <li>• pain Assessment and management</li> </ul>                                                                                                                                                                                                                                                                                                                                                                     | 1 hour   |
| 18. | Applies knowledge and skills in using the HMC approved Documentation forms and systems                                                                                                                                                   | Documentation                                             | CERNER                                                                                                                                                                                                                                                                                                                                                                                                                                                                                             | 1 hour   |

| No. | Specific Learning Outcomes                                                                                                                                                                         | TOPIC                                       | CONTENT                                                                                                                                                                                                                                                                            | Time    |
|-----|----------------------------------------------------------------------------------------------------------------------------------------------------------------------------------------------------|---------------------------------------------|------------------------------------------------------------------------------------------------------------------------------------------------------------------------------------------------------------------------------------------------------------------------------------|---------|
| 19. | Demonstrate ability to assess PAAC patients.<br>Demonstrate ability to identify pre surgery risk factors through pre surgery examination and assessment.<br>Applies NICE guidelines into practice. | Pre Anaesthesia Patient Assessment workshop | <ul style="list-style-type: none"><li>• Health history &amp; interviewing skills</li><li>• Respiratory system assessment</li><li>• Cardiovascular Assessment</li><li>• Specific conditions pt. assessment and management</li><li>• Pre-op patient &amp; family education</li></ul> | 5 hour  |
| 20. | Undertake the program Summative Assessment<br>Program Evaluation                                                                                                                                   | Summative Assessment Program Evaluation     | assessment under exam conditions; program evaluation                                                                                                                                                                                                                               | 2 hours |
